# Supplementary material
Source: PubMed Central journal article supplement (PMC7425812)
Supplement: NIHMS1606946-supplement-1.pdf [file NIHMS1606946-supplement-1.pdf]

## Supplementary Information for

### Biophysical properties of AKAP95 protein condensates regulate splicing and tumorigenesis

#### References for Extended Data Figures

71. Illuminating the Dark Proteome. *Cell* **166**, 1074-1077 (2016).
72. Di Rienzo, C., Gratton, E., Beltram, F. & Cardarelli, F. Fast spatiotemporal correlation spectroscopy to determine protein lateral diffusion laws in live cell membranes. *Proceedings of the National Academy of Sciences of the United States of America* **110**, 12307-12312 (2013).
